# Supplementary material for: Non-Stationary Flood Discharge Frequency Analysis in West Africa
Source: MDPI journal article supplement (doi:10.3390/geohazards4030018), 2023-08-11
Supplement: s1 [file s1]

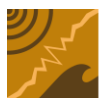

**Table S1.** Significance of the models determined.

| Stations          | BIC GEV0 | BIC Best Model | Gap   | Significance |
|-------------------|----------|----------------|-------|--------------|
| Ahlan             | 422.38   | 407.96         | 14.42 | Very strong  |
| Atchakpa          | 515.72   | 499.67         | 16.05 | Very strong  |
| Beterou           | 521.92   | 510.71         | 11.21 | Very strong  |
| Say               | 412.40   | 397.42         | 14.98 | Very strong  |
| Garbey<br>Kourou  | 393.25   | 381.3          | 11.95 | Very strong  |
| Jiderebodo        | 466.06   | 458.06         | 8     | Strong       |
| Kaboua            | 349.83   | 344.05         | 5.78  | Positive     |
| Kakassi           | 288.69   | 278.33         | 10.36 | Strong       |
| WED-<br>MILLSTONE | 560.07   | 560.07         | 0     | -            |
| Koulikoro         | 577.55   | 577.55         | 0     | -            |
| Mopti             | 473.69   | 472.47         | 1.22  | Weak         |
| Nawuni            | 467.46   | 467.46         | 0     | -            |
| Patience<br>Oti   | 476.77   | 472.66         | 4.11  | Positive     |

**Table S2.** Summary of selected parameters by station for non-stationarity.

| Stations         | Parameters |         |            |      |       |       | Covariates |                  |                | Criterion<br>(BIC) |
|------------------|------------|---------|------------|------|-------|-------|------------|------------------|----------------|--------------------|
|                  | Position   |         | Log(Scale) |      |       |       | Shape      | Position         | Scale          |                    |
|                  | Mu0        | Mu1     | Mu2        | Phi0 | Phi1  | Phi2  |            |                  |                |                    |
| Ahlan            | 744.27     | −106.61 | 5.7        | 4.96 |       |       | −0.42      | MEI-AS,<br>time  |                | 407.96             |
| Atchakpa         | 426.12     | 451.50  | 10.48      | 5.37 | 0.52  |       | −0.07      | TSAI-M5<br>,time | TSAI-M5        | 499.67             |
| Beterou          | 276.35     | 228.41  |            | 4.84 |       |       | −0.12      | TSAI-M5          |                | 510.71             |
| Say              | 1431.13    | 153.54  | 17.49      | 5.68 | −0.03 |       | −0.34      | TNAI-M9,<br>time | time           | 397.42             |
| Sheaf<br>Kourou  | 122.55     | −33.59  | 5.22       | 4.21 |       |       | 0.14       | MEI-JJ, time     |                | 381.3              |
| Jidere<br>Bode   | 1815.63    | 241.11  | 21.63      | 6.66 | 2.2   | −0.03 | −0.08      | DMIW-M7,<br>time | DMIW-M7 , time | 458.06             |
| Kaboua           | 168.01     | 166.47  | 2.73       | 4.58 |       |       | −0.19      | DMIW-M1<br>,time |                | 344.05             |
| Kakassi          | 66.66      | 1.75    |            | 3.46 | 2.64  |       | 0.36       | time             | DMIW-M1        | 278.33             |
| Wed<br>Millstone | 3493.03    |         |            | 6.78 |       |       | −0.47      |                  |                | 560.07             |
| Koulikoro        | 3937.88    |         |            | 6.9  |       |       | −0.25      |                  |                | 577.55             |
| Mopti            | 2228.79    |         |            | 6.18 |       |       | −0.48      |                  |                | 473.69             |
| Nawuni           | 1305.42    |         |            | 6.98 |       |       | −1.09      |                  |                | 467.46             |
| Patience<br>Oti  | 1387.14    | 30.06   |            | 6.7  |       |       | −0.13      | time             |                | 472.66             |
